# Supplementary material for: Disease progression in Parkinson’s disease patients with mild cognitive impairment: 5-year longitudinal study from the early Parkinson’s disease longitudinal Singapore (PALS) cohort
Source: publisher site journal article supplement (doi:10.18632/aging.206040), 2024-08-12
Supplement: Supplementary file [file aging-v16i15-206040-supplementary-material-SD1.pdf]

## SUPPLEMENTARY TABLE

**Supplementary Table 1. Number of patients in the follow-up (%).**

| <b>Visit</b> | <b>overall (n)</b> | <b>PD-MCI(n,%)</b> | <b>PD-NC(n,%)</b> |
|--------------|--------------------|--------------------|-------------------|
| Baseline     | 205                | 107(100%)          | 98(100%)          |
| 2nd Year     | 172                | 91(85.0%)          | 81(82.7%)         |
| 3rd Year     | 138                | 73(68.2%)          | 65(66.3%)         |
| 4th Year     | 116                | 65(60.7%)          | 51(52.0%)         |
| 5th Year     | 70                 | 35 (32.7%)         | 35(35.7%)         |
